# Supplementary material for: Decelerated dinosaur skull evolution with the origin of birds
Source: PLOS journal article supplement (doi:10.1371/journal.pbio.3000801), 2020-08-18
Supplement: S1 (10.1371/journal.pbio.3000801.s001) [file journal.pbio.3000801.s001]

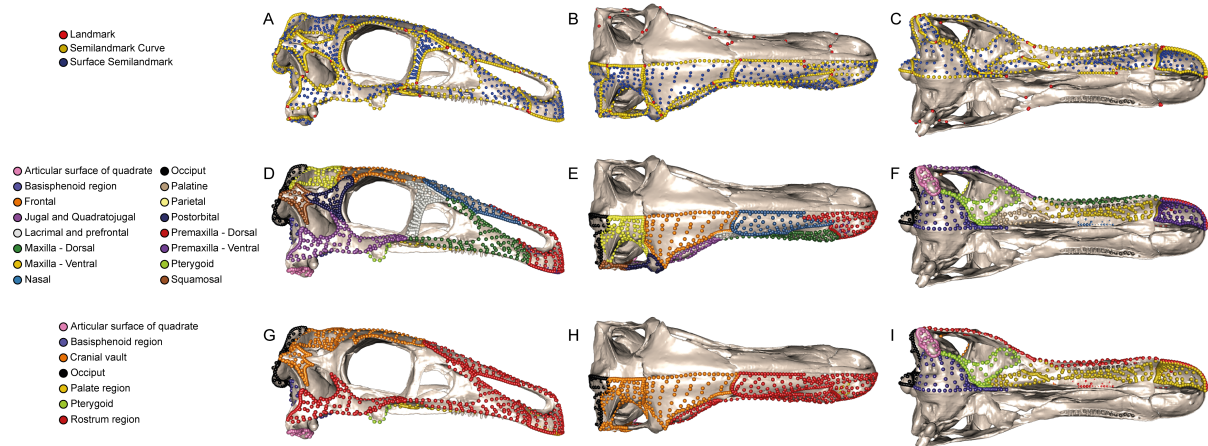

**S1 Fig. High-dimension Geometric Morphometric Approach.** Anatomical landmarks and semilandmark curves were digitized onto 3D surface meshes and surface semilandmarks were projected on to the skull using the Morpho R package (A, lateral; B, dorsal; C, ventral). Landmark configurations for dinosaurs were partitioned into a total of 16 atomical regions (D, lateral; E, dorsal; F, ventral). Non-avian dinosaurs were compared to non-avian dinosaurs by re-partitioning landmarks into regions that can be distinguished in both birds and non-avian dinosaurs (G, lateral; H, dorsal; I, ventral). Landmark configuration illustrated on *Erlikosaurus andrewsi* (IGM 100/111). Data and code archived at [www.github.com/rnfelice/Dinosaur\\_Skulls](http://www.github.com/rnfelice/Dinosaur_Skulls).
