# Supplementary material for: Decelerated dinosaur skull evolution with the origin of birds
Source: PLOS journal article supplement (doi:10.1371/journal.pbio.3000801), 2020-08-18
Supplement: S25 (10.1371/journal.pbio.3000801.s025) [file journal.pbio.3000801.s025]

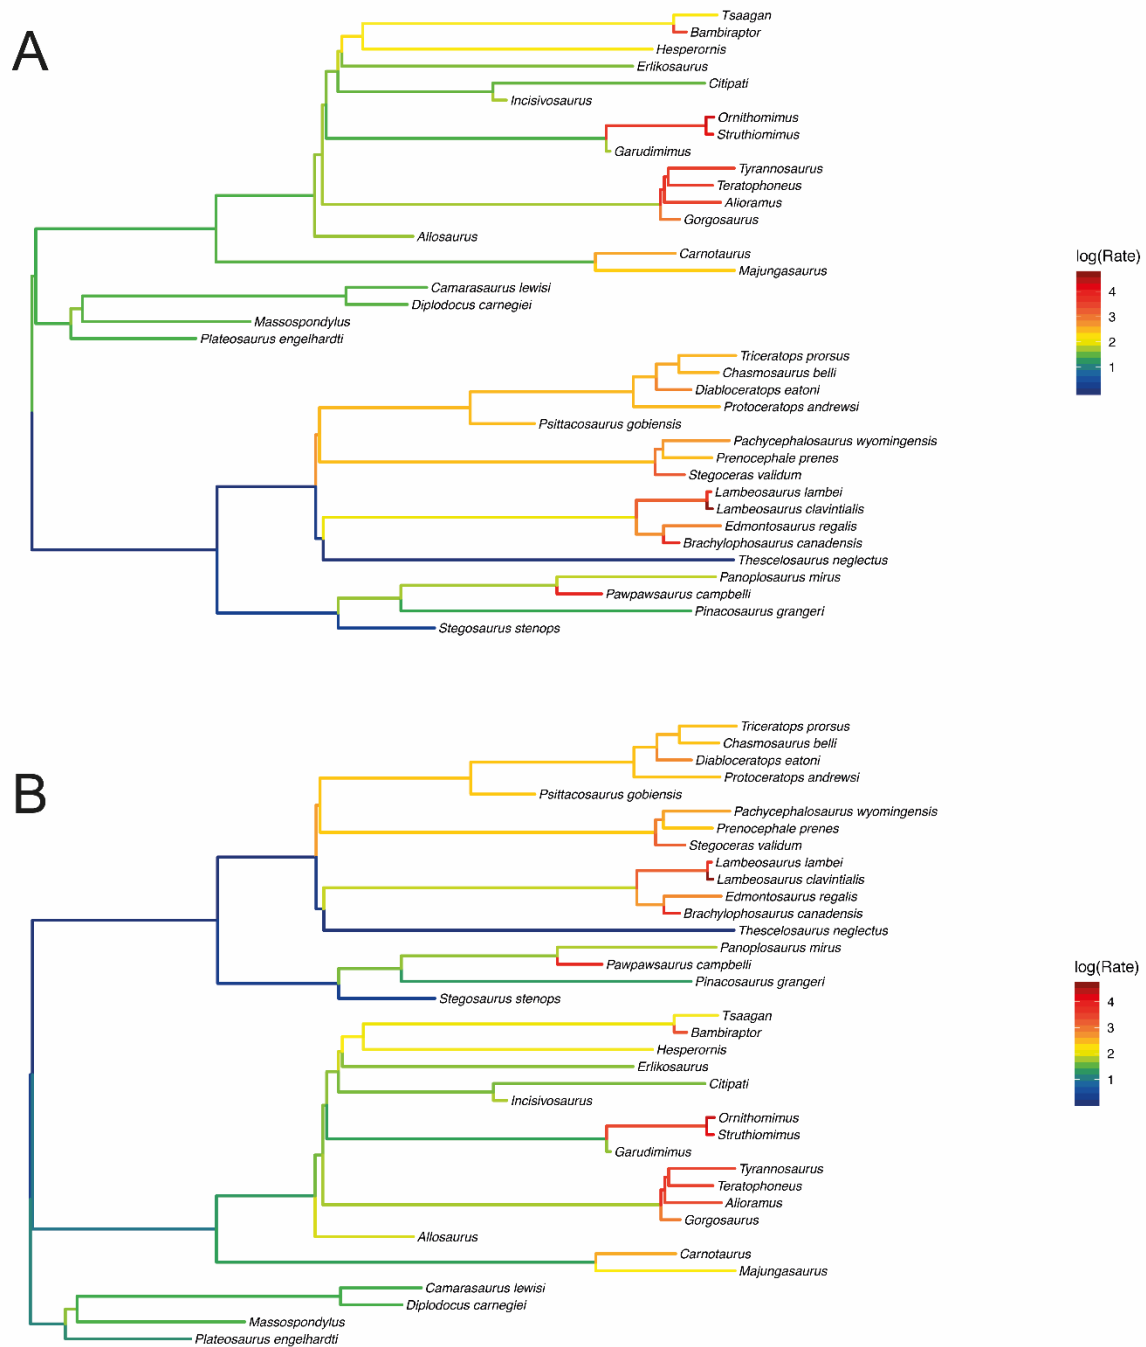

**S25 Fig. Estimation of rates of squamosal bone evolution.** Modelled using the (A) traditional phylogenetic hypothesis and (B) Ornithoscelida hypothesis under a variable-rates Brownian motion model of evolution. Data and code archived at [www.github.com/rnfelice/Dinosaur\\_Skulls](http://www.github.com/rnfelice/Dinosaur_Skulls).
